# Supplementary material for: Rational design of interface refining through Ti4+/Zr4+ diffusion/doping and TiO2/ZrO2 surface crowning of ZnFe2O4 nanocorals for photoelectrochemical water splitting
Source: Royal Society of Chemistry journal article supplement (doi:10.1039/d0cy02255a), 2021-01-01
Supplement: d0cy02255a1.pdf [file d0cy02255a1.pdf]

## Supporting Information for

### **Rational Design of Interface Refining through Ti<sup>4+</sup>/Zr<sup>4+</sup> diffusion/doping and TiO<sub>2</sub>/ZrO<sub>2</sub> Surface Crowning of ZnFe<sub>2</sub>O<sub>4</sub> Nanocorals for Photoelectrochemical Water Splitting**

Sarang Kim<sup>a,‡</sup>, Mahadeo A. Mahadik<sup>a,‡</sup>, Anushkaran Periyasamy<sup>a</sup>, Weon-Sik Chae<sup>b</sup>, Jungho Ryu<sup>c</sup>, Sun Hee Choi<sup>d,\*</sup> and Jum Suk Jang<sup>a,\*</sup>

<sup>a</sup>Division of Biotechnology, Advanced Institute of Environmental and Bioscience, College of Environmental and Bioresource Sciences, Chonbuk National University, Iksan 570-752, Republic of Korea.

<sup>b</sup>Daegu Center, Korea Basic Science Institute, Daegu 41566, Republic of Korea

<sup>c</sup>Geologic Environment Research Division, Korea Institute of Geoscience and Mineral Resources (KIGAM) Daejeon 305-350, Republic of Korea.

<sup>d</sup>Pohang Accelerator Laboratory (PAL), Pohang University of Science and Technology (POSTECH), Pohang 37673, Republic of Korea.

\*Corresponding authors: Tel.: +82 63 850 0846; fax: +82 63 850 0834

E-mail address: [shchoi@postech.ac.kr](mailto:shchoi@postech.ac.kr) (S. H. Choi); [jangjs75@jbnu.ac.kr](mailto:jangjs75@jbnu.ac.kr) (J.S. Jang)

‡Authors with equal contributions.

## Figures

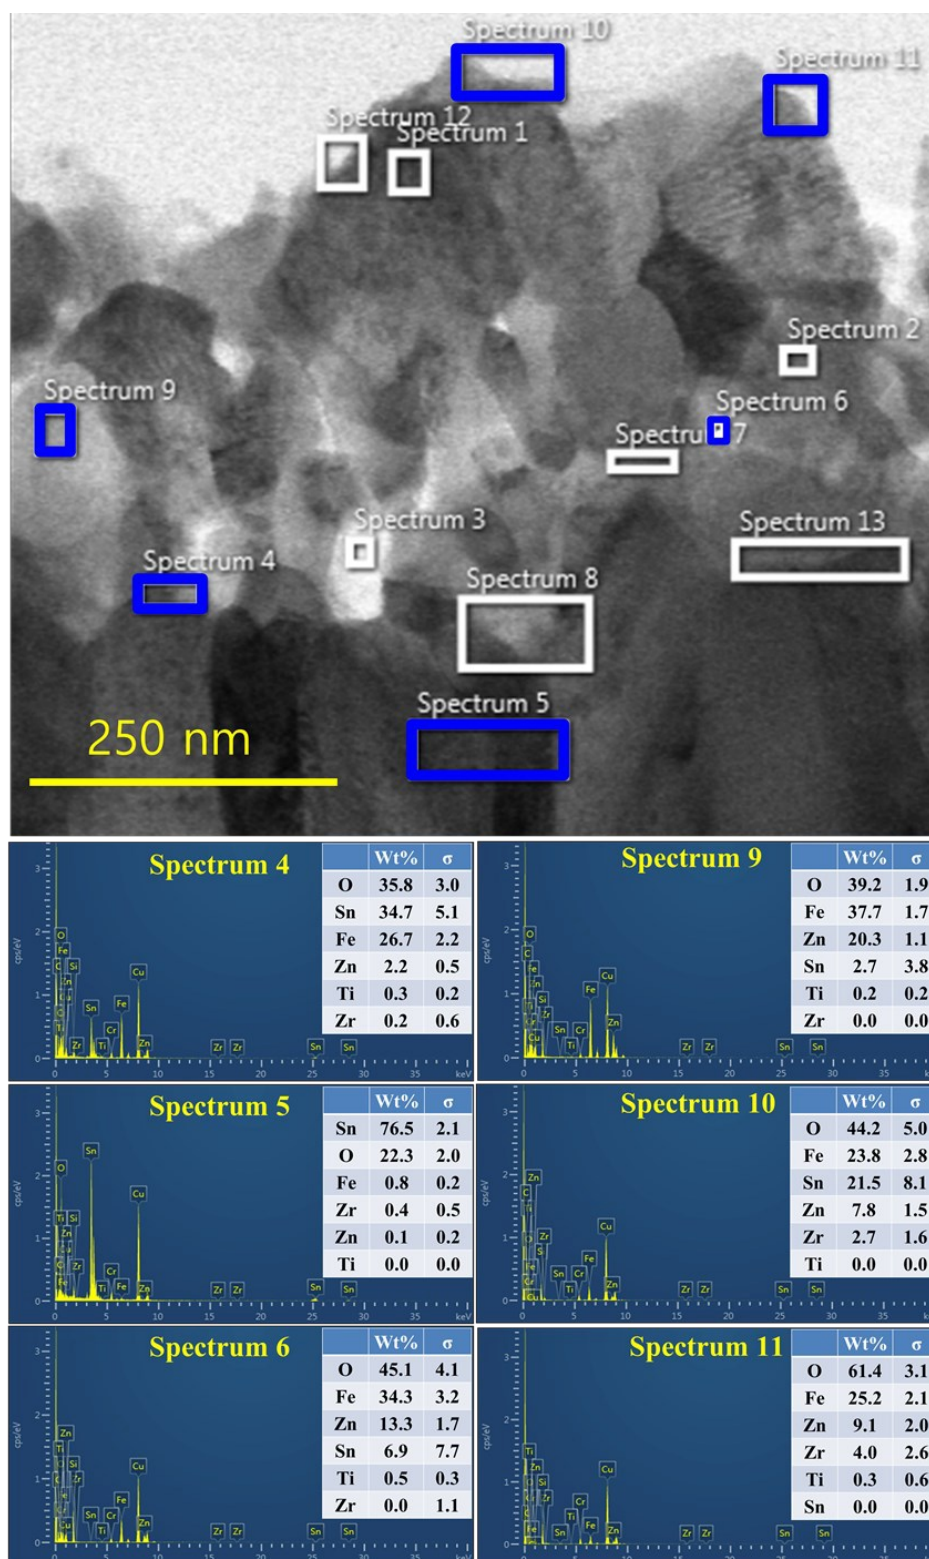

**Fig. S1** TEM cross-sectional micrographs after FIB cutting of TZF-15 photoanodes with their respective EDS spectra, revealing the wt% compositions of Fe, O, Zn, Zr, Ti and Sn elements.

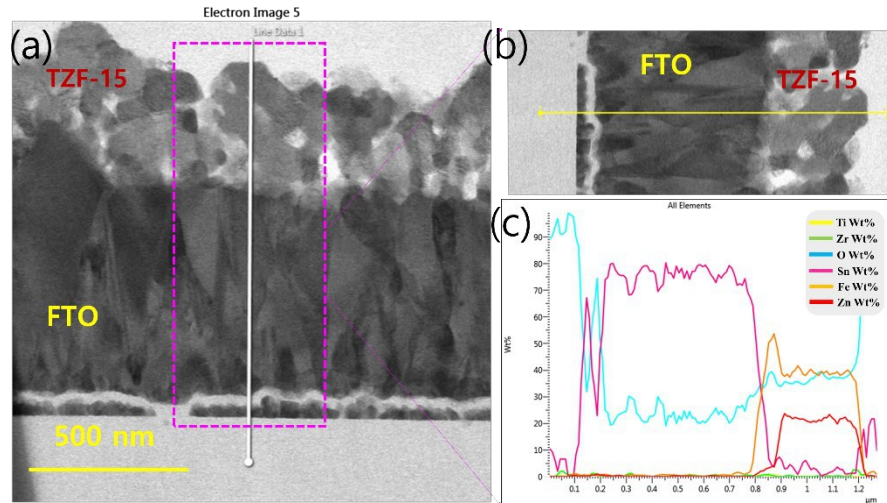

**Fig. S2** (a) FIB-TEM cross-sectional micrographs of TZF-15 photoanode. (b, c) corresponding TEM-line profile gained from TEM-EDS analysis, revealing the diffusion/doping of Ti ions from TiO<sub>2</sub> underlayer.

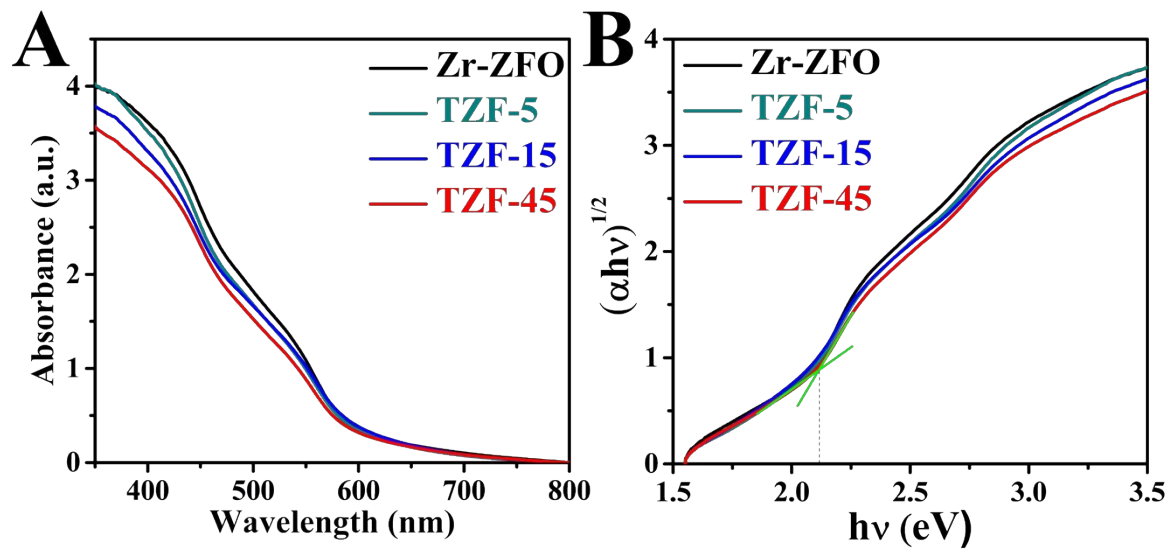

**Fig. S3** (A) UV-vis absorbance spectra and (B) Tauc plots of Zr-ZFO, TZF-5, TZF-15 and TZF-45 photoanodes respectively.

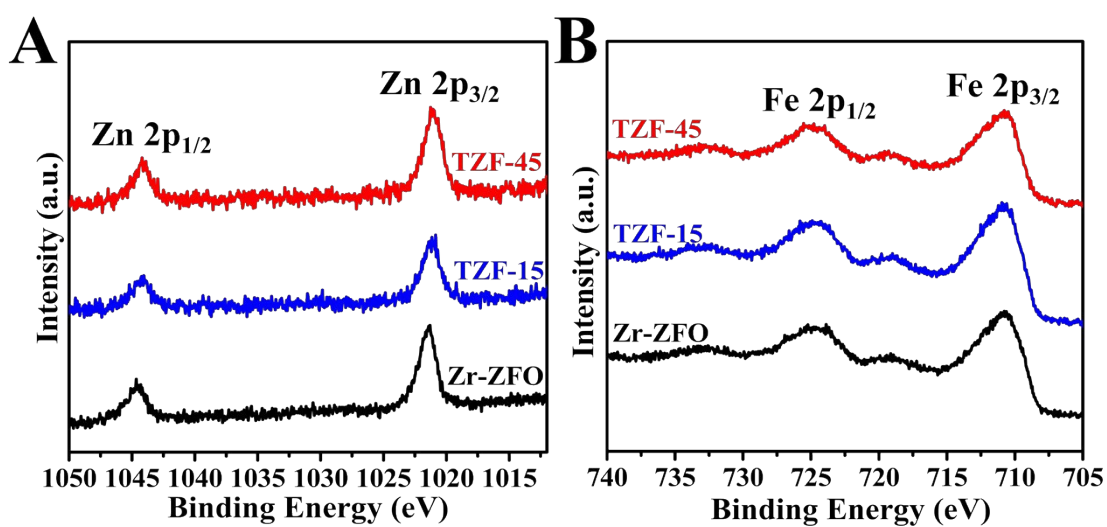

**Fig. S4** XPS spectra of (A) Zn 2p and (B) Fe 2p for Zr-ZFO, TZF-15 and TZF-45 photoanodes respectively.

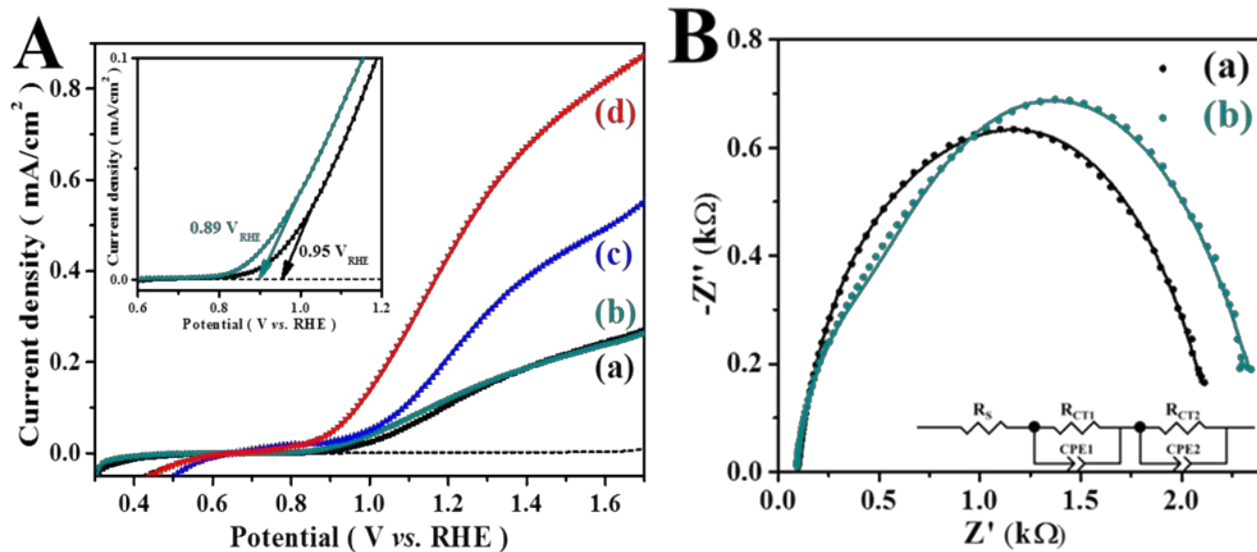

**Fig. S5** (A) Photocurrent density–potential characteristics under light (solid lines)/in the dark (dashed lines) conditions for (a) pure ZFO, (b) pure ZFO with 15mM TiO<sub>2</sub> underlayer, (c) Zr-ZFO and (d) TZF-15 photoanodes. The onset potential of (a) pure ZFO, (b) pure ZFO with 15mM TiO<sub>2</sub> underlayer shown in the inset of Figure S5A. (B) Nyquist plots under light for (a) pure ZFO, (b) pure ZFO with 15mM TiO<sub>2</sub> underlayer photoanodes with the equivalent circuit for the EIS fitting (inset), the 1 M NaOH used as electrolyte solution.

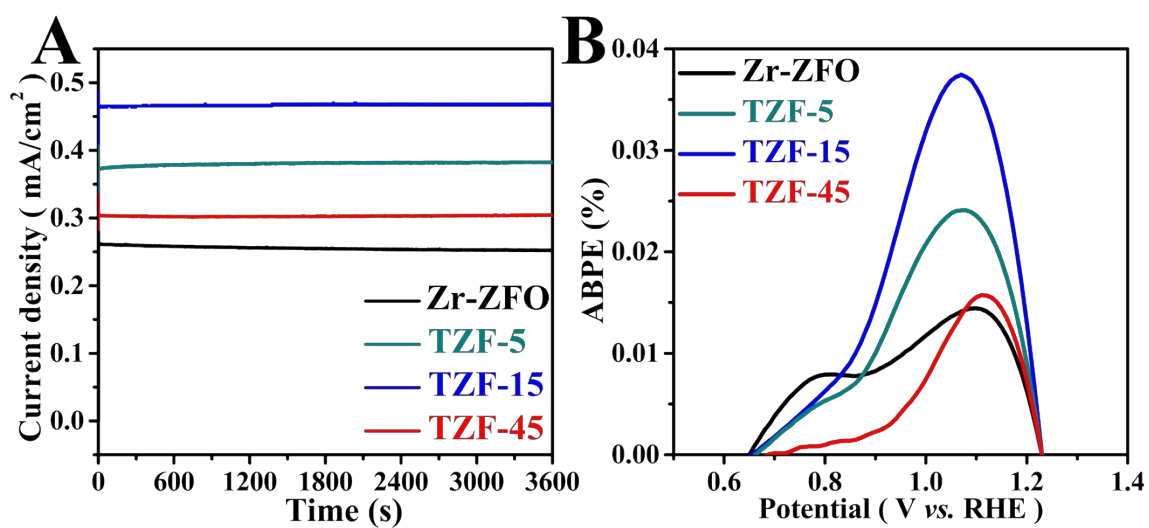

**Fig. S6** (A) photo-stability test under 1 sun illumination condition using 1 M NaOH at 1.23 V vs. RHE and (B) Photoconversion efficiency as a function of applied potential for Zr-ZFO, TZF-5, TZF-15 and TZF-45 photoanodes respectively.

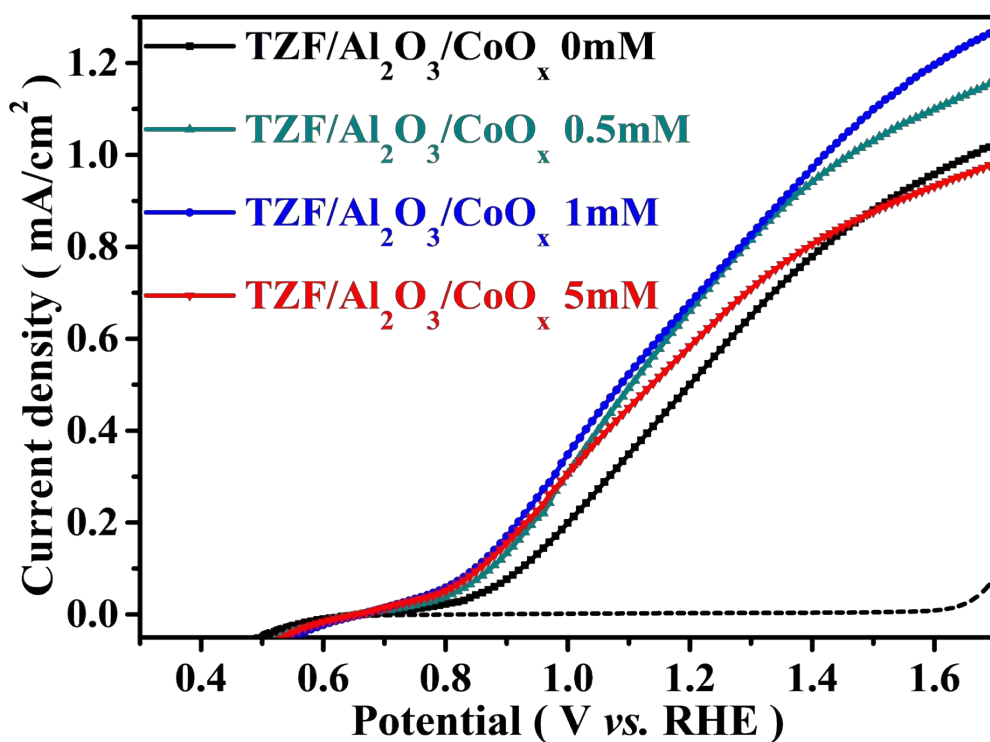

**Fig. S7** Photocurrent density–potential characteristics under light (solid lines)/in the dark (dashed lines) conditions using 1 M NaOH for sample prepared with different concentration of cobalt precursor solutions; TZF/Al<sub>2</sub>O<sub>3</sub>/CoO<sub>x</sub>\_0mM, TZF/Al<sub>2</sub>O<sub>3</sub>/CoO<sub>x</sub>\_0.5mM, TZF/Al<sub>2</sub>O<sub>3</sub>/CoO<sub>x</sub>\_1mM and TZF/Al<sub>2</sub>O<sub>3</sub>/CoO<sub>x</sub>\_5mM.



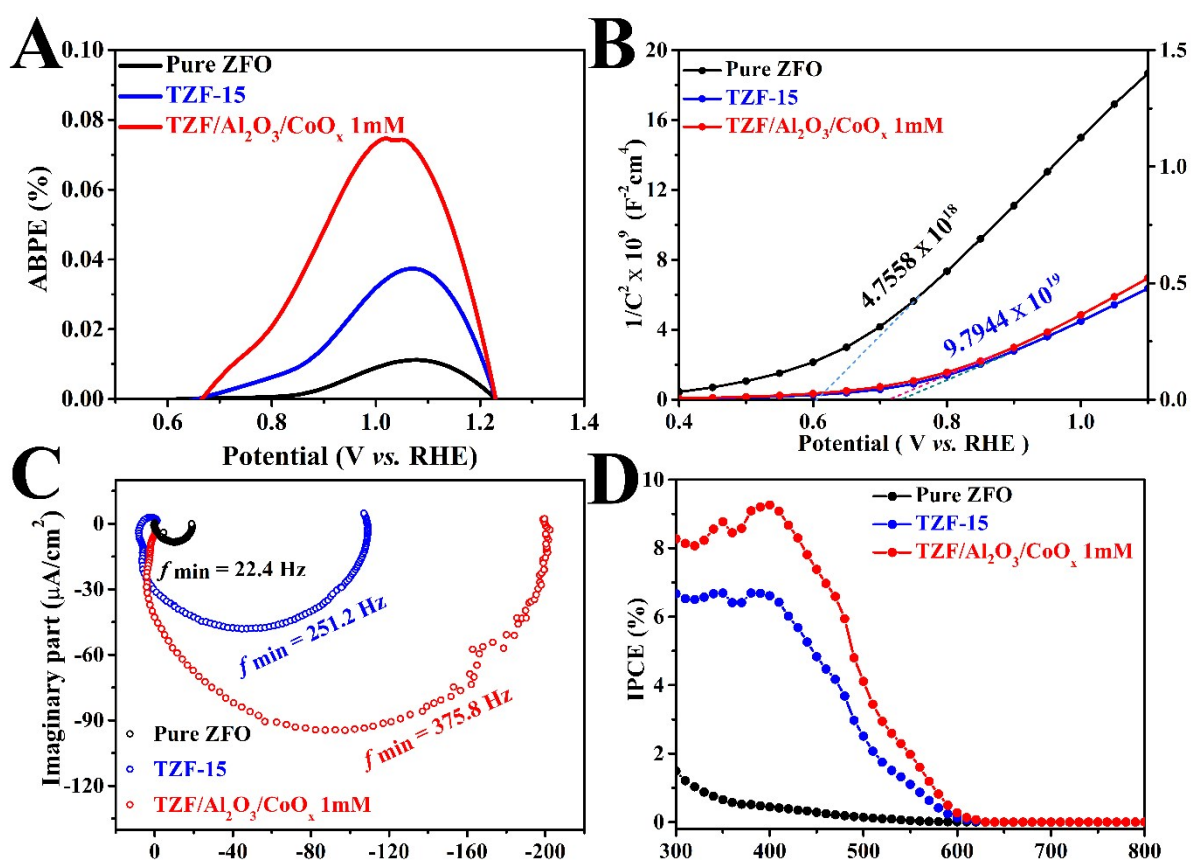

**Fig. S8** (A) Photoconversion efficiency as a function of applied potential, (B) Mott-Schottky plots, (C) Complex plane plots of the IMPS response and (D) IPCE spectra of pure ZFO, TZF-15 and TZF/Al<sub>2</sub>O<sub>3</sub>/CoO<sub>x</sub> 1mM photoanodes at 1.23 V vs. RHE using 1 M NaOH as electrolyte solution.

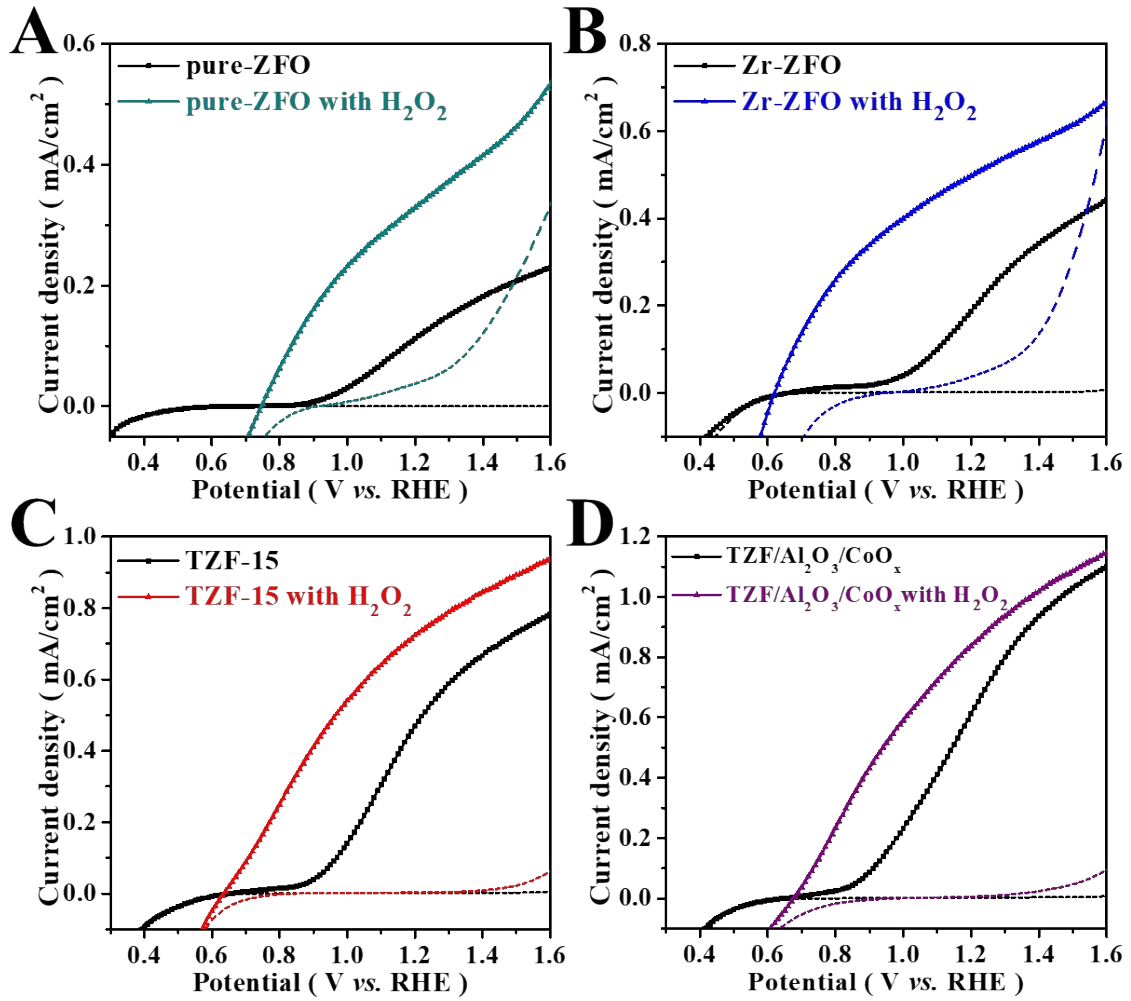

**Fig. S9** Photocurrent density–potential characteristics of (A) pure ZFO, (B) Zr-ZFO, (C) TZF-15 and (D) TZF/Al<sub>2</sub>O<sub>3</sub>/CoO<sub>x</sub>\_1mM photoanodes under dark and illumination conditions using 1 M NaOH and 1 M NaOH + 0.5 M H<sub>2</sub>O<sub>2</sub> with hole scavenger test.

**Calculation of charge separation efficiencies:** The charge separation efficiencies in the bulk ( $\eta_{\text{bulk}}$ ) and on the surface ( $\eta_{\text{surface}}$ ) of as-prepared photoanodes were measured by the addition of 0.5 M H<sub>2</sub>O<sub>2</sub> as a hole scavenger in 1 M NaOH electrolyte solution. The  $\eta_{\text{surface}}$  was calculated

by following equation: <sup>[1, 2]</sup>

$$J_{\text{H}_2\text{O}} = J_{\text{abs}} \times \eta_{\text{bulk}} \times \eta_{\text{surface}} \quad (\text{S1})$$

where  $J_{\text{H}_2\text{O}}$  is the measured photocurrent density,  $J_{\text{abs}}$  is the photon absorption expressed as a current density (i.e., absorbed photon-to-current efficiency (APCE) = 100%).

With the addition of 0.5 M H<sub>2</sub>O<sub>2</sub> as the electrolyte, the oxidation kinetics of the system is very rapid so that it largely suppresses the surface recombination of charge carriers without influencing the bulk charge separation, thus,  $\eta_{\text{surface}}$  could be regarded as 100%.

Therefore,  $\eta_{\text{bulk}}$

and  $\eta_{\text{surface}}$  can be determined by:

$$\eta_{\text{bulk}} = J_{\text{H}_2\text{O}_2} / J_{\text{abs}} \quad (\text{S2})$$

$$\eta_{\text{surface}} = J_{\text{H}_2\text{O}} / J_{\text{H}_2\text{O}_2} \quad (\text{S3})$$

where  $J_{\text{H}_2\text{O}}$  and  $J_{\text{H}_2\text{O}_2}$  are the photocurrent density measured in the 1 M NaOH electrolyte solution and the 1 M NaOH electrolyte solution with 0.5 M H<sub>2</sub>O<sub>2</sub>.

## Tables

**Table S1.** EIS fitting parameters obtained from (a) pure ZFO and (b) pure ZFO with 15 mM TiO<sub>2</sub> underlayer photoanodes respectively, determined by fitting the experimental data using the equivalent circuit at 1.23 V vs. RHE.

| Samples/<br>Parameters | R <sub>s</sub> (Ω) | R <sub>CT1</sub><br>(Ω) | R <sub>CT2</sub><br>(Ω) | CPE1 (F)                | CPE2 (F)                |
|------------------------|--------------------|-------------------------|-------------------------|-------------------------|-------------------------|
| (a)                    | 93                 | 1684                    | 409                     | 1.95 x 10 <sup>-5</sup> | 8.14 x 10 <sup>-6</sup> |
| (b)                    | 87                 | 2090                    | 260                     | 1.43 x 10 <sup>-5</sup> | 2.76 x 10 <sup>-6</sup> |

**Table S2.** Electron transport time results of the IMPS response for (a) Zr-ZFO, (b) TZF-5, (c) TZF-15 and (d) TZF-45 photoanodes respectively, at 1.23 V vs. RHE.

| Samples | Frequency (Hz) | Electron transport time (μs) |
|---------|----------------|------------------------------|
| (a)     | 126            | 1265                         |
| (b)     | 237            | 672                          |
| (c)     | 251            | 634                          |
| (d)     | 178            | 896                          |

**Table S3.** PL lifetime parameters of (a) Zr-ZFO, (b) TZF-15 and (c) TZF-45 photoanodes.

| Samples | A <sub>1</sub> (%) | τ <sub>1</sub> (ns) | A <sub>2</sub> (%) | τ <sub>2</sub> (ns) | A <sub>3</sub> (%) | τ <sub>3</sub> (ns) | < τ > <sup>a)</sup> (ns) |
|---------|--------------------|---------------------|--------------------|---------------------|--------------------|---------------------|--------------------------|
| (a)     | 85                 | 0.30                | 14                 | 1.1                 | 1                  | 5.6                 | 0.47                     |
| (b)     | 98                 | 0.17                | 2                  | 2.0                 | -                  | -                   | 0.21                     |
| (c)     | 89                 | 0.23                | 10                 | 1.2                 | 1                  | 30                  | 0.62                     |

**Table S4.** Atomic percent of the elements by X-ray Photoelectron Spectroscopy for (a) TZF-15 and (b) TZF/Al<sub>2</sub>O<sub>3</sub>/CoO<sub>x</sub>\_1mM photoanodes respectively.

| Samples | Co (%) | Al (%) | Ti (%) | Zr (%) | Zn (%) | Fe (%) | O (%) | Sn (%) |
|---------|--------|--------|--------|--------|--------|--------|-------|--------|
| (a)     | 0      | 0      | 1.21   | 3.000  | 4.96   | 24.56  | 66.12 | 0.16   |
| (b)     | 1.08   | 1.87   | 1.27   | 5.90   | 2.08   | 20.13  | 67.50 | 0.17   |

**Table S5.** Comparative PEC activities and applications of ZnFe<sub>2</sub>O<sub>4</sub> photoanodes prepared by different synthetic methods.

| Photoanodes                                                         | Synthetic method                                                                  | Morphology                             | Electrolyte | Performance (mA/cm <sup>2</sup> at 1.23 V vs. RHE) | Application                       | Stability [Ref.] |
|---------------------------------------------------------------------|-----------------------------------------------------------------------------------|----------------------------------------|-------------|----------------------------------------------------|-----------------------------------|------------------|
| Synthesis of ZnFe <sub>2</sub> O <sub>4</sub> and Co-catalysts      | Hybrid microwave annealing and Co-Pi electrodeposition                            | Nanorods                               | 1 M NaOH    | 0.24                                               | PEC water splitting               | 180 min [3]      |
| Sn-doped ZnFe <sub>2</sub> O <sub>4</sub>                           | Two-step hightemperature quenching                                                | Nanorods                               | 1 M NaOH    | 0.13                                               | PEC water splitting               | 120 min [4]      |
| Ti-doped ZnFe <sub>2</sub> O <sub>4</sub>                           | Spray pyrolysis                                                                   | Nanoparticles                          | 1 M NaOH    | 0.35                                               | PEC water splitting               | 330 min [5]      |
| Co-doped ZnFe <sub>2</sub> O <sub>4</sub>                           | All Solution based synthesis                                                      | Nanoparticles                          | -           | -                                                  | Photodegradation (methylene blue) | - [6]            |
| Synthesis of ZnFe <sub>2</sub> O <sub>4</sub>                       | Hydrogen treatment                                                                | Nanorods                               | 1 M NaOH    | 0.32                                               | PEC water splitting               | 180 min [7]      |
| ZnFe <sub>2</sub> O <sub>4</sub> /TiO <sub>2</sub> heterostructures | Solution-phase materials growth techniques and atomic layer deposition (ALD) step | Nanosheets/ Nanowires Heterostructures | 1 M KOH     | ≈ 0.75                                             | PEC water splitting               | [8]              |
| Dy-doped ZnFe <sub>2</sub> O <sub>4</sub>                           | Superficial chemical precipitation                                                | Nanoparticles                          | -           | -                                                  | Photodegradation (methylene       | - [9]            |

|                                                                                                                                                                         |                                                                         |                         |                                                   |             |                            |                             |
|-------------------------------------------------------------------------------------------------------------------------------------------------------------------------|-------------------------------------------------------------------------|-------------------------|---------------------------------------------------|-------------|----------------------------|-----------------------------|
| Cu-Sn dual doped ZnFe <sub>2</sub> O <sub>4</sub>                                                                                                                       | Chemical bath deposition                                                | Nanorods                | Nanorods<br>0.5 M Na <sub>2</sub> SO <sub>4</sub> | 0.46        | PEC water splitting        | 30 sec [10]                 |
| Synthesis of ZnFe <sub>2</sub> O <sub>4</sub>                                                                                                                           | Atomic layer Deposition                                                 | Nanorods                | 0.1 M NaOH                                        | 0.26        | PEC water splitting        | - [11]                      |
| Fe <sup>3+</sup> self-doped spinel ZnFe <sub>2</sub> O <sub>4</sub> with abundant oxygen vacancies (Zn <sub>1-x</sub> Fe <sub>x</sub> )Fe <sub>2</sub> O <sub>4-y</sub> | simple spincoating method, and subsequent hydrogen reduction treatment  | worm-like nanoparticles | 1 M NaOH                                          | 0.22        | PEC water splitting        | 7 h [12]                    |
| Ti-doped ZnFe <sub>2</sub> O <sub>4</sub> and Co-catalysts                                                                                                              | Solution based hydrothermal method and NiFeO <sub>x</sub> chemical bath | Irregular nanorods      | 1 M KOH                                           | 0.312       | PEC water splitting        | 360 min [13]                |
| Nanorod array ZFO photoanodes                                                                                                                                           | deposition method and drop casting                                      | Nanorods                | 1 M NaOH                                          | 0.8         | PEC analysis               | [14]                        |
| NiFeO <sub>x</sub> /TZFH <sub>2</sub> photoanode                                                                                                                        | Hybrid microwave annealing                                              | Irregular nanorods      | 1 M NaOH                                          | 0.91        | PEC analysis               | 10 h [15]                   |
| <b>TiO<sub>2</sub>-underlayer <i>in-situ</i> Zirconium doped zinc ferrite nanocorals /Al<sub>2</sub>O<sub>3</sub>/CoO<sub>x</sub> 1mM</b>                               | <b>Simple solution method</b>                                           | <b>Nanocorals</b>       | <b>1 M NaOH</b>                                   | <b>0.73</b> | <b>PEC water splitting</b> | <b>600 min [This study]</b> |

---

**Table S6.** EIS fitting parameters obtained for (a) pure ZFO, (b) TZF-15 and (c) TZF/Al<sub>2</sub>O<sub>3</sub>/CoO<sub>x</sub>\_1mM photoanodes respectively, determined by fitting the experimental data using the equivalent circuit at 1.23 V vs. RHE.

| Samples/<br>Parameters | R <sub>s</sub> (Ω) | R <sub>CT1</sub><br>(Ω) | R <sub>CT2</sub><br>(Ω) | CPE1 (F)                | CPE2 (F)                |
|------------------------|--------------------|-------------------------|-------------------------|-------------------------|-------------------------|
| (a)                    | 93                 | 1684                    | 409                     | 1.95 x 10 <sup>-5</sup> | 8.14 x 10 <sup>-6</sup> |
| (b)                    | 65                 | 410                     | 120                     | 1.59 x 10 <sup>-4</sup> | 4.48 x 10 <sup>-5</sup> |
| (c)                    | 69                 | 424                     | 108                     | 1.81 x 10 <sup>-4</sup> | 4.97 x 10 <sup>-5</sup> |

**Table S7.** Electron transport time results of the IMPS response for (a) pure ZFO, (b) TZF-15 and (c) TZF/Al<sub>2</sub>O<sub>3</sub>/CoO<sub>x</sub>\_1mM photoanodes respectively, at 1.23 V vs. RHE.

| Samples | Frequency (Hz) | Electron transport time (μs) |
|---------|----------------|------------------------------|
| (a)     | 23             | 7108                         |
| (b)     | 251            | 634                          |
| (c)     | 376            | 424                          |

## References

- [1] H. Dotan, K. Sivula, M. Graetzel, A. Rothschild, S.C. Warren, *Energy Environ. Sci.*, 2011, **4**, 958-964.
- [2] S. S. Yi, B. R. Wulan, J. M. Yan, Q. Jiang, *Adv. Funct. Mater.*, 2019, **29**, 1801902.
- [3] J. H. Kim, J. H. Kim, J. W. Jang, J. Y. Kim, S. H. Choi, G. Magesh, J. W. Lee, J. S. Lee, *Adv. Energy Mater.*, 2015, **5**, 1401933.
- [4] J. W. Park, M. A. Mahadik, G. W. An, S. Y. Lee, G. Piao, S. H. Choi, W. S. Chae, H. S. Chung, H. W. Park, J. S. Jang, *Sol. Energy Mater. Sol. Cells*, 2018, **187**, 207-218.
- [5] Y. Guo, N. Zhang, X. Wang, Q. Qian, S. Zhang, Z. Li, Z. Zou, *J. Mater. Chem. A*, 2017, **5**, 7571-7577.
- [6] G. Fan, J. Tong, F. Li, *Ind. Eng.*, 2012, **51**, 13639-13647.
- [7] J. H. Kim, Y. J. Jang, J. H. Kim, J. W. Jang, S. H. Choi, J. S. Lee, *Nanoscale*, 2015, **7**, 19144-19151.
- [8] X. L. Zheng, C. T. Dinh, F. P. G. Arquer, B. Zhang, M. Liu, O. Voznyy, Y. Y. Li, G. Knight, S. Hoogland, Z. H. Lu, X. W. Du, E. H. Sargent, *Small*, 2016, **12**, 3181-3188.
- [9] P. A. Vinosha, S. Deepapriya, J. D. Rodney, S. J. Das, *AIP Conf. Proc*, 2018, **1942**, 050001.
- [10] Y. Lan, Z. Liu, Z. Guo, M. Ruan, Y. Xin, *J. Colloid Interface Sci.*, 2019, **552**, 111-121.
- [11] A. G. Hufnagel, K. Peters, A. Muller, C. Scheu, D. Fattakhova-Rohlfing, T. Bein, *Adv. Funct. Mater.*, 2016, **26**, 4425.
- [12] J. Wang, Y. Wang, X. Xv, Y. Chen, X. Yang, J. Zhou, S. Li, F. Cao, G. Qin, *Dalton Trans.*, 2019, **48**, 11934-11940.
- [13] J. H. Kim, J. H. Kim, J. H. Kim, Y. K. Kim, J. S. Lee, *Solar RRL*, 2020, **4**, 1900328.
- [14] X. Zhu, N. Guijarro, Y. Liu, P. Schouwink, R. A. Wells, F. L. Formal, S. Sun, C. Gao, K. Sivula, *Adv. Mater.* 2018, **30**, 1801612.
- [15] J. H. Kim, Y. J. Jang, S. H. Choi, B. J. Lee, J. H. Kim, Y. B. Park, C. M. Nam, H. G. Kim, J. S. Lee, *J. Mater. Chem. A*, 2018, **6**, 12693-12700.
